# Supplementary material for: Generation of arbitrary monotonic concentration profiles by a serial dilution microfluidic network composed of microchannels with a high fluidic-resistance ratio
Source: Royal Society of Chemistry journal article supplement (doi:10.1039/b816995k), 2009-01-01
Supplement: b816995k.pdf [file b816995k.pdf]

## Electronic Supplementary Information For

### Generation of arbitrary monotonic concentration profiles by a serial dilution microfluidic network composed of microchannels with a high fluidic-resistance ratio

Koji Hattori, Shinji Sugiura,\* and Toshiyuki Kanamori

Research Center of Advanced Bionics, National Institute of Advanced Industrial Science and Technology (AIST), Central 5th, 1-1-1 Higashi, Tsukuba, Ibaraki, 305-8565 Japan.

Fax: +81-29-861-6286; Tel: +81-29-861-6278; Email: shinji.sugiura@aist.go.jp

Table S1. Length of microchannels in microfluid networks used in this study

| Microchannel No. <sup>a</sup> | Length [ $\mu\text{m}$ ] |         |         |
|-------------------------------|--------------------------|---------|---------|
|                               | MN-Lin1, MN-Lin2         | MN-Log1 | MN-Log2 |
| MC <sub>0,1</sub>             | 780                      | 6150    | 2210    |
| MC <sub>0,2</sub>             |                          |         |         |
| MC <sub>0,3</sub>             | 36750                    | 18810   | 11710   |
| MC <sub>0,4</sub>             | 3500                     | 3750    | 2660    |
| MC <sub>1,1</sub>             | 27250                    | 16150   | 4460    |
| MC <sub>1,2</sub>             | 3500                     | 4000    | 58500   |
| MC <sub>1,3</sub>             | 26250                    | 15120   | 10480   |
| MC <sub>1,4</sub>             | 3500                     | 3750    | 2660    |
| MC <sub>2,1</sub>             | 44750                    | 20160   | 5690    |
| MC <sub>2,2</sub>             | 3000                     | 4000    | 58500   |
| MC <sub>2,3</sub>             | 17500                    | 11480   | 9260    |
| MC <sub>2,4</sub>             | 3500                     | 3750    | 2660    |
| MC <sub>3,1</sub>             | 58750                    | 24580   | 6920    |
| MC <sub>3,2</sub>             | 2500                     | 4000    | 58490   |
| MC <sub>3,3</sub>             | 10500                    | 7970    | 8030    |
| MC <sub>3,4</sub>             | 3500                     | 3750    | 2660    |
| MC <sub>4,1</sub>             | 69250                    | 30090   | 8150    |
| MC <sub>4,2</sub>             | 2000                     | 4000    | 58480   |
| MC <sub>4,3</sub>             | 5250                     | 4690    | 6800    |
| MC <sub>4,4</sub>             | 3500                     | 3750    | 2660    |
| MC <sub>5,1</sub>             | 76250                    | 38850   | 9380    |
| MC <sub>5,2</sub>             | 1500                     | 4000    | 58440   |
| MC <sub>5,3</sub>             | 1750                     | 1880    | 5570    |
| MC <sub>5,4</sub>             | 3500                     | 3750    | 2660    |
| MC <sub>6,1</sub>             | 79750                    | 62030   | 10630   |
| MC <sub>6,2</sub>             | 1000                     | 4000    | 58310   |

|                    |       |       |       |
|--------------------|-------|-------|-------|
| MC <sub>6,3</sub>  | 0     | 0     | 4350  |
| MC <sub>6,4</sub>  |       |       | 2660  |
| MC <sub>7,1</sub>  | 39870 | 31010 | 11930 |
| MC <sub>7,2</sub>  |       |       | 57910 |
| MC <sub>7,3</sub>  |       |       | 3130  |
| MC <sub>7,4</sub>  |       |       | 2660  |
| MC <sub>8,1</sub>  |       |       | 13430 |
| MC <sub>8,2</sub>  |       |       | 56650 |
| MC <sub>8,3</sub>  |       |       | 1940  |
| MC <sub>8,4</sub>  |       |       | 2660  |
| MC <sub>9,1</sub>  |       |       | 15680 |
| MC <sub>9,2</sub>  |       |       | 52650 |
| MC <sub>9,3</sub>  |       |       | 840   |
| MC <sub>9,4</sub>  |       |       | 2660  |
| MC <sub>10,1</sub> |       |       | 21860 |
| MC <sub>10,2</sub> |       |       | 40000 |
| MC <sub>10,3</sub> |       |       | 0     |
| MC <sub>10,4</sub> |       |       |       |
| MC <sub>11,1</sub> |       |       | 14950 |

<sup>a</sup> Microchannel No. (MC<sub>k,l</sub>) corresponds to the variables of fluidic resistance ( $R_{k,l}$ ) and flow rate ( $Q_{k,l}$ ) depicted in Fig.1. MC<sub>k,1</sub> corresponds to the inlet-side-resistance-microchannel. MC<sub>k,2</sub> corresponds to the diffusion-mixing-microchannel. MC<sub>k,3</sub> corresponds to the outlet-side-resistance microchannel. MC<sub>k,4</sub> corresponds to the connection-microchannel.

Table S2. Fluidic resistance of microchannels in microfluid networks used in this study

| Microchannel<br>No. | Fluidic resistance [mPa s $\mu\text{m}^{-3}$ ] |         |         |         |
|---------------------|------------------------------------------------|---------|---------|---------|
|                     | MN-Lin1                                        | MN-Lin2 | MN-Log1 | MN-Log2 |
| MC <sub>0,1</sub>   | 2.5                                            | 0.41    | 39      | 0.14    |
| MC <sub>0,2</sub>   |                                                |         |         |         |
| MC <sub>0,3</sub>   | 120                                            | 19      | 120     | 0.76    |
| MC <sub>0,4</sub>   | 11                                             | 1.8     | 24      | 0.17    |
| MC <sub>1,1</sub>   | 88                                             | 14      | 100     | 0.29    |
| MC <sub>1,2</sub>   | 0.0072                                         | 0.0077  | 0.00056 | 0.0066  |
| MC <sub>1,3</sub>   | 84                                             | 14      | 96      | 0.68    |
| MC <sub>1,4</sub>   | 11                                             | 1.8     | 24      | 0.17    |
| MC <sub>2,1</sub>   | 140                                            | 23      | 130     | 0.37    |
| MC <sub>2,2</sub>   | 0.0062                                         | 0.0066  | 0.00056 | 0.0066  |
| MC <sub>2,3</sub>   | 56                                             | 9.1     | 73      | 0.60    |
| MC <sub>2,4</sub>   | 11                                             | 1.8     | 24      | 0.17    |
| MC <sub>3,1</sub>   | 190                                            | 31      | 160     | 0.45    |
| MC <sub>3,2</sub>   | 0.0051                                         | 0.006   | 0.00056 | 0.0066  |
| MC <sub>3,3</sub>   | 34                                             | 5.5     | 51      | 0.52    |
| MC <sub>3,4</sub>   | 11                                             | 1.8     | 24      | 0.17    |
| MC <sub>4,1</sub>   | 220                                            | 36      | 190     | 0.53    |
| MC <sub>4,2</sub>   | 0.0041                                         | 0.0044  | 0.00056 | 0.0066  |
| MC <sub>4,3</sub>   | 17                                             | 2.7     | 30      | 0.44    |
| MC <sub>4,4</sub>   | 11                                             | 1.8     | 24      | 0.17    |
| MC <sub>5,1</sub>   | 250                                            | 40      | 250     | 0.61    |
| MC <sub>5,2</sub>   | 0.0031                                         | 0.0033  | 0.00056 | 0.0066  |
| MC <sub>5,3</sub>   | 5.6                                            | 0.91    | 12      | 0.36    |
| MC <sub>5,4</sub>   | 11                                             | 1.8     | 24      | 0.17    |
| MC <sub>6,1</sub>   | 260                                            | 42      | 390     | 0.69    |
| MC <sub>6,2</sub>   | 0.0021                                         | 0.0022  | 0.00056 | 0.0066  |
| MC <sub>6,3</sub>   | 0                                              | 0       | 0       | 0.28    |
| MC <sub>6,4</sub>   |                                                |         |         | 0.17    |
| MC <sub>7,1</sub>   | 130                                            | 21      | 200     | 0.77    |
| MC <sub>7,2</sub>   |                                                |         |         | 0.0066  |
| MC <sub>7,3</sub>   |                                                |         |         | 0.20    |
| MC <sub>7,4</sub>   |                                                |         |         | 0.17    |
| MC <sub>8,1</sub>   |                                                |         |         | 0.87    |
| MC <sub>8,2</sub>   |                                                |         |         | 0.0064  |
| MC <sub>8,3</sub>   |                                                |         |         | 0.13    |
| MC <sub>8,4</sub>   |                                                |         |         | 0.17    |

---

|                   |        |
|-------------------|--------|
| MC <sub>9,1</sub> | 1.0    |
| MC <sub>9,2</sub> | 0.0060 |
| MC <sub>9,3</sub> | 0.054  |
| MC <sub>9,4</sub> | 0.17   |

---

|                    |        |
|--------------------|--------|
| MC <sub>10,1</sub> | 1.4    |
| MC <sub>10,2</sub> | 0.0045 |
| MC <sub>10,3</sub> | 0      |
| MC <sub>10,4</sub> |        |

---

|                    |      |
|--------------------|------|
| MC <sub>11,1</sub> | 0.97 |
|--------------------|------|

---
